# Supplementary material for: Uncovering Cis-Regulatory Elements Important for A-to-I RNA Editing in Fusarium graminearum
Source: PubMed Central journal article supplement (PMC9600606; doi:10.1128/mbio.01872-22), 2022-09-14

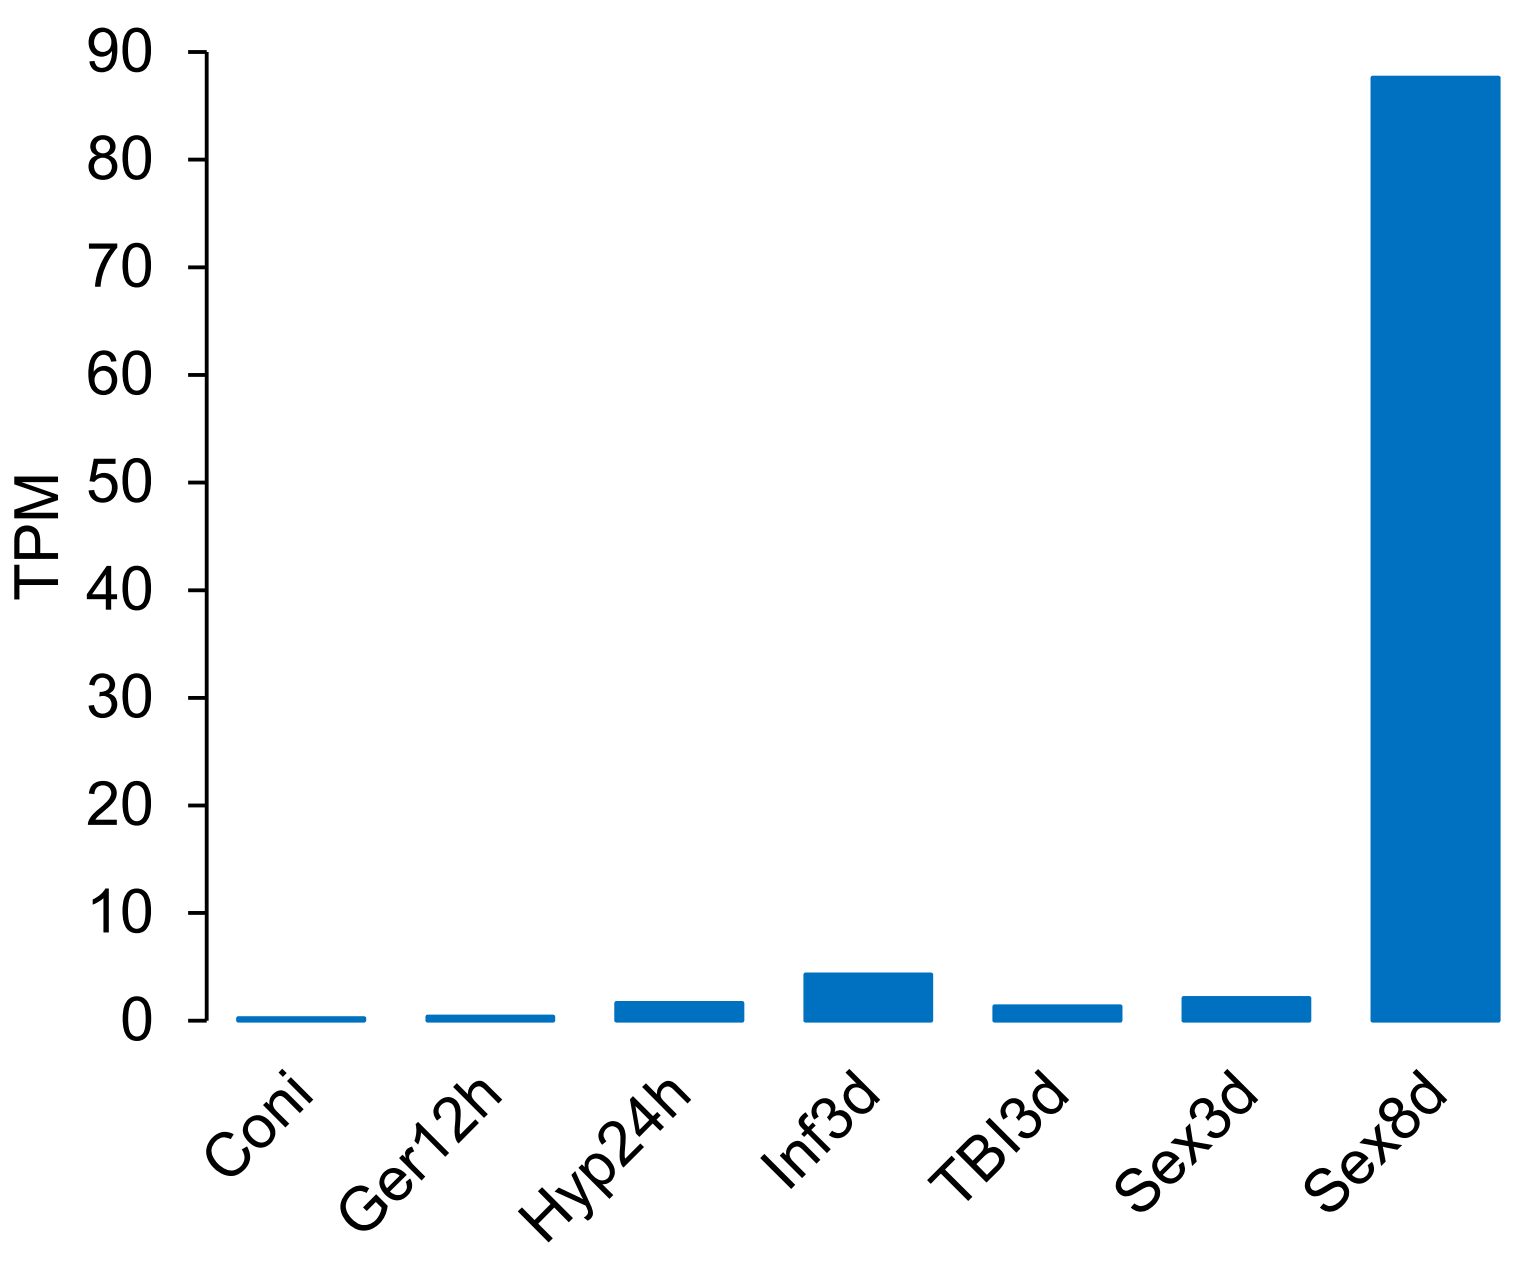

Supplement: mbio.01872-22-s0003.pdf [file mbio.01872-22-s0003.pdf]
